# Supplementary material for: A one-step synthesis of novel high pH-sensitive nitrogen-doped yellow fluorescent carbon dots and their detection application in living cells
Source: Royal Society of Chemistry journal article supplement (doi:10.1039/c9ay01794a), 2019-01-01
Supplement: c9ay01794a1.pdf [file c9ay01794a1.pdf]

## **Supplementary Material**

### **A novel high pH-sensitive nitrogen-doped yellow fluorescent carbon dots based one-step synthesis and detection application in living cells**

Lian Shen†, Changjun Hou†, Jaiwei Li†, Xianfeng Wang†, Yanan Zhao†, Huiling Yang†, Siyi Yang†, Mei Yang†, Xiaogang Luo†\*, Danqun Huo†\*

† Key Laboratory of Biorheological Science and Technology of Ministry of Education, State and Local Joint Engineering Laboratory for Vascular Implants, Bioengineering College of Chongqing University, Chongqing 400044, P.R. China

\* Corresponding author. Tel.: +862365112673; fax: +862365102507 ;

E-mail: huodq@cqu.edu.cn or luosteel@cqu.edu.cn.

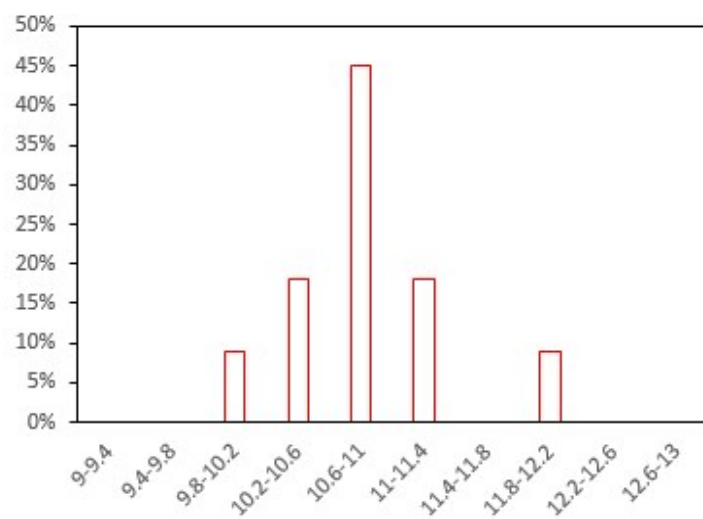

**Fig.S1** size distribution histogram of the N-CDs.

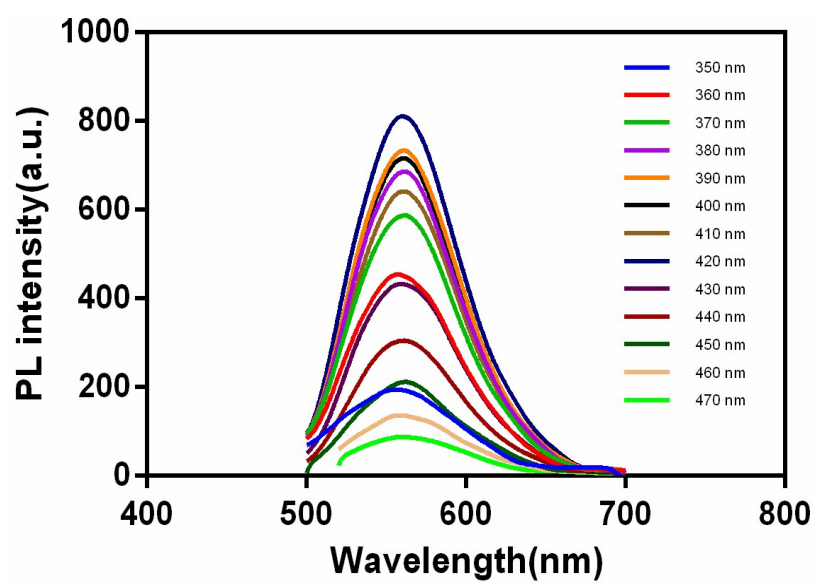

**Fig.S2** Fluorescence emission spectra of the N-CDs recorded at excitation wavelengths from 350 nm to 470 nm.

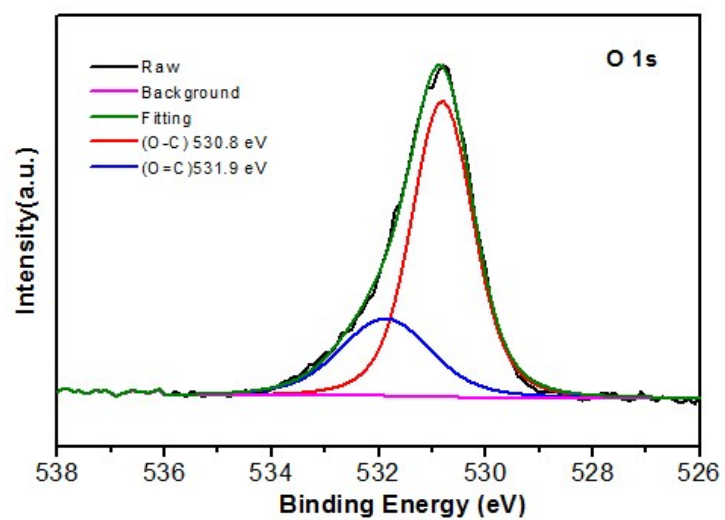

**Fig.S3** O1s spectra of the N-CDs.

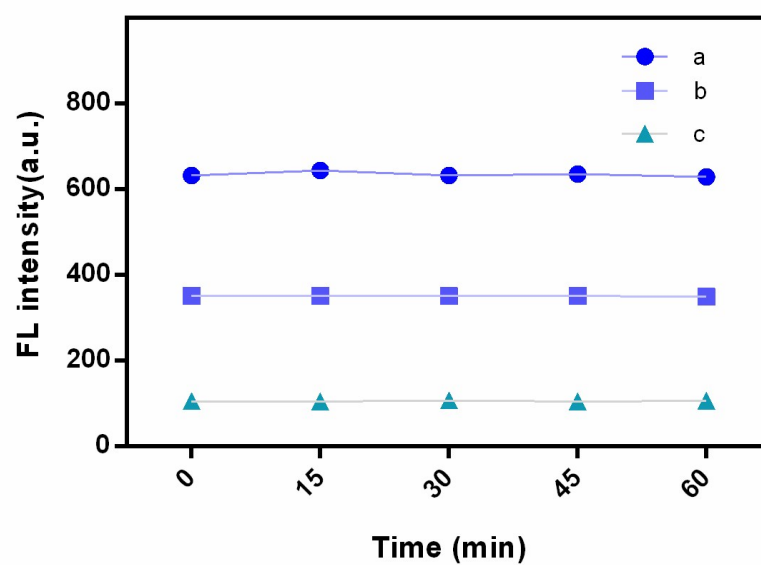

**Fig.S4** Time scan of the fluorescence intensity of N-CDs for 1h at pH=6.0 (a), 5.0 (b), 4.0 (c).
